# Supplementary material for: Synonymous Codon Ordering: A Subtle but Prevalent Strategy of Bacteria to Improve Translational Efficiency
Source: PubMed Central journal article supplement (PMC3303843; doi:10.1371/journal.pone.0033547), 2012-03-14

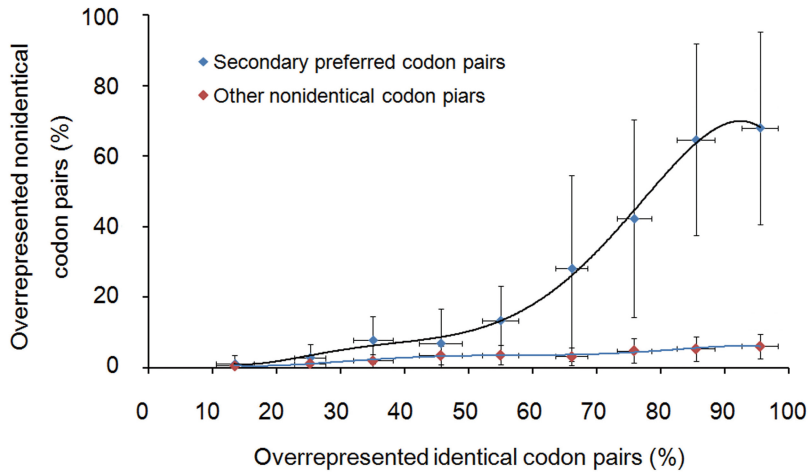

Supplement: pone.0033547.s002.pdf [file pone.0033547.s002.pdf]
